# Supplementary material for: Effectiveness of nationwide screening and lifestyle intervention for abdominal obesity and cardiometabolic risks in Japan: The metabolic syndrome and comprehensive lifestyle intervention study on nationwide database in Japan (MetS ACTION-J study)
Source: PubMed Central journal article supplement (PMC5760033; doi:10.1371/journal.pone.0190862), 2018-01-09
Supplement: pone.0190862.s009.pdf [file pone.0190862.s009.pdf]

**Table S3. Baseline characteristics stratified by gender**

| Characteristics        | Overall cohort                                            |                                                     |                 | Propensity-score matched cohort                     |                 |
|------------------------|-----------------------------------------------------------|-----------------------------------------------------|-----------------|-----------------------------------------------------|-----------------|
|                        | No risk group<br>(eligible for<br>healthcare<br>guidance) | Risk group (eligible for<br>interventional program) |                 | Risk group (eligible for<br>interventional program) |                 |
|                        |                                                           | Non-<br>participants                                | Participants    | Non-<br>participants                                | Participants    |
| <b>Men</b>             |                                                           |                                                     |                 |                                                     |                 |
| n                      | 1 726 967                                                 | 747 963                                             | 86 969          | 59 553                                              | 59 566          |
| Age, %                 |                                                           |                                                     |                 |                                                     |                 |
| 40-45                  | 30.6                                                      | 27.0                                                | 22.3            | 22.3                                                | 22.8            |
| 45-50                  | 25.0                                                      | 25.5                                                | 22.9            | 22.6                                                | 23.6            |
| 50-55                  | 19.6                                                      | 22.1                                                | 19.9            | 20.0                                                | 20.7            |
| 55-60                  | 11.8                                                      | 13.6                                                | 13.1            | 13.7                                                | 13.7            |
| 60-65                  | 5.2                                                       | 5.3                                                 | 7.1             | 7.8                                                 | 6.7             |
| 65-70                  | 5.8                                                       | 4.9                                                 | 10.7            | 10.0                                                | 9.1             |
| >70                    | 1.9                                                       | 1.7                                                 | 4.1             | 3.5                                                 | 3.4             |
| Smoking                | 39.6                                                      | 40.4                                                | 35.1            | 36.1                                                | 36.3            |
| WC, cm                 | 79.7 (6.1)                                                | 91.1 (5.7)                                          | 90.9 (5.5)      | 90.9 (5.4)                                          | 90.8 (5.3)      |
| BMI, kg/m <sup>2</sup> | 22.1 (2.2)                                                | 26.0 (2.4)                                          | 25.9 (2.3)      | 25.9 (2.4)                                          | 25.9 (2.3)      |
| SBP, mm Hg             | 120.0 (14.9)                                              | 130.1 (15.7)                                        | 129.8 (15.1)    | 130.0 (15.7)                                        | 129.8 (15.1)    |
| DBP, mm Hg             | 75.2 (10.4)                                               | 82.5 (11.0)                                         | 81.7 (10.5)     | 81.7 (10.8)                                         | 81.7 (10.5)     |
| TG, mg/dl              | 94 (68 - 129)                                             | 153 (105 - 208)                                     | 151 (102 - 204) | 153 (105 - 208)                                     | 151 (102 - 204) |
| HDL, mg/dl             | 61.7 (15.0)                                               | 52.7 (12.6)                                         | 52.6 (12.5)     | 52.5 (12.7)                                         | 52.6 (12.6)     |
| FBG, mg/dl             | 93.3 (8.7)                                                | 98.5 (9.8)                                          | 98.0 (9.6)      | 98.7 (9.8)                                          | 98.2 (9.6)      |
| HbA1c, %               | 5.4 (0.3)                                                 | 5.5 (0.4)                                           | 5.5 (0.4)       | 5.5 (0.4)                                           | 5.5 (0.4)       |
| <b>Women</b>           |                                                           |                                                     |                 |                                                     |                 |
| n                      | 1 623 387                                                 | 159 946                                             | 24 810          | 16 224                                              | 16 211          |
| Age, %                 |                                                           |                                                     |                 |                                                     |                 |
| 40-45                  | 23.9                                                      | 15.1                                                | 7.0             | 10.0                                                | 7.8             |
| 45-50                  | 21.5                                                      | 17.9                                                | 9.1             | 13.9                                                | 10.0            |
| 50-55                  | 18.1                                                      | 19.8                                                | 11.6            | 15.1                                                | 13.0            |
| 55-60                  | 12.6                                                      | 15.6                                                | 13.6            | 12.9                                                | 15.1            |
| 60-65                  | 10.2                                                      | 12.0                                                | 21.0            | 15.4                                                | 20.9            |
| 65-70                  | 10.6                                                      | 14.5                                                | 28.1            | 24.0                                                | 25.0            |

|                        |              |                |                |                |                |
|------------------------|--------------|----------------|----------------|----------------|----------------|
| >70                    | 3.1          | 5.0            | 9.7            | 8.7            | 8.2            |
| Smoking                | 9.4          | 9.5            | 4.8            | 7.3            | 5.2            |
| WC, cm                 | 76.5 (7.6)   | 91.9 (7.0)     | 92.3 (6.5)     | 92.0 (6.7)     | 92.1 (6.5)     |
| BMI, kg/m <sup>2</sup> | 21.1 (2.4)   | 27.1 (2.8)     | 26.7 (2.6)     | 26.8 (2.7)     | 26.7 (2.6)     |
| SBP, mm Hg             | 116.4 (16.2) | 133.3 (16.9)   | 133.4 (16.1)   | 133.2 (16.7)   | 133.5 (16.3)   |
| DBP, mm Hg             | 70.8 (10.6)  | 80.7 (11.0)    | 79.4 (10.3)    | 79.7 (10.9)    | 79.7 (10.4)    |
| TG, mg/dl              | 72 (54 - 99) | 114 (81 - 164) | 115 (83 - 163) | 114 (81 - 164) | 115 (83 - 163) |
| HDL, mg/dl             | 71.2 (15.6)  | 60.3 (13.8)    | 59.5 (13.5)    | 59.9 (13.7)    | 59.7 (13.6)    |
| FBG, mg/dl             | 90.0 (8.1)   | 97.0 (9.7)     | 96.7 (9.5)     | 96.9 (9.8)     | 96.6 (9.6)     |
| HbA1c, %               | 5.4 (0.3)    | 5.6 (0.3)      | 5.6 (0.3)      | 5.6 (0.3)      | 5.6 (0.3)      |

WC, waist circumference; BMI, body mass index; SBP, systolic blood pressure; DBP, diastolic blood pressure; TG, triglyceride; HDL, high-density lipoprotein cholesterol; HbA1c, haemoglobin A1c; and FBG, fasting blood glucose.
