# Supplementary material for: Effectiveness of nationwide screening and lifestyle intervention for abdominal obesity and cardiometabolic risks in Japan: The metabolic syndrome and comprehensive lifestyle intervention study on nationwide database in Japan (MetS ACTION-J study)
Source: PLOS journal article supplement (doi:10.1371/journal.pone.0190862), 2018-01-09
Supplement: S5 (10.1371/journal.pone.0190862.s005) [file journal.pone.0190862.s005]

**Figure S1. Categorical Waist and Body Mass Index Loss for the matched cohort**

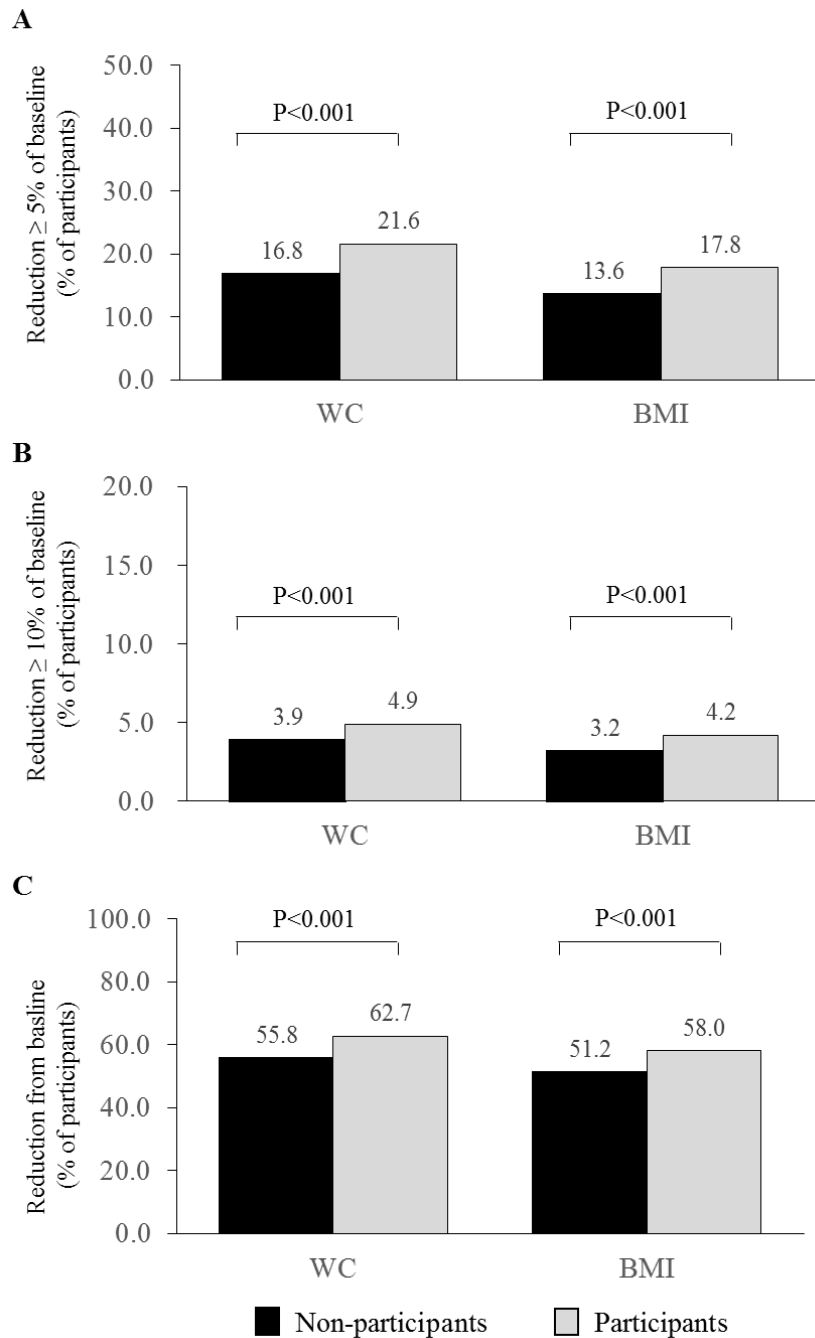

Panel A shows the percentage of participants who lost 5% or more of their baseline WC (waist circumferences) or BMI (body mass index), Panel B shows the percentage of participants who lost 10% or more of their baseline WC or BMI, and Panel C shows the percentage of participants in each group who were at or below their baseline WC or BMI after 3 years. WC, waist circumferences; BMI, body mass index.
